# Supplementary material for: Four metal–organic frameworks based on a semirigid tripodal ligand and different secondary building units: structures and electrochemical performance
Source: Royal Society of Chemistry journal article supplement (doi:10.1039/c6ce01068g), 2016-01-01
Supplement: c6ce01068g1.pdf [file c6ce01068g1.pdf]

## Supporting Information

### Four Metal-Organic Frameworks Based on a Semirigid Tripodal Ligand and Different Secondary Building Units: Structures and Electrochemical Performance

Xiao-Ming Lin,<sup>\*a,b</sup> Ji-Liang Niu,<sup>a</sup> Dan-Ni Chen,<sup>a</sup> Pei-Xian Wen,<sup>a</sup> Da-Liang Zhang<sup>b</sup> and Yue-Peng Cai<sup>\*a</sup>

<sup>a</sup> *School of Chemistry and Environment, South China Normal University; Guangzhou Key Laboratory of Materials for Energy Conversion and Storage, 510006, P.R. China, E-mail: caiyp@scnu.edu.cn*

<sup>b</sup> *State Key Laboratory of Supramolecular Structure and Material, College of Chemistry, Jilin University, Changchun, 130012, P.R. China.*

#### Contents

- 1. Table S1.** Selected bond lengths and angles for compounds **1-4**.
- 2. Table S2.** The twisting angles of 4-carboxyphenoxy groups vs. the central benzene ring.
- 3. Figure S1.** A space-filling view of the porous network showing three different types of 1D channels along the crystallographic (a) *a*-axis, (b) *b*-axis, and (c) *c*-axis, in which the solvent molecules are omitted for clarity.
- 4. Figure S2.** The distances observed between the adjacent layers in **1-3**.
- 5. Figure S3.** Powder x-ray diffraction patterns of **1** to **4**.
- 6. Figure S4.** Cyclic voltammetry curve at 0.1 mV s<sup>-1</sup> scan rate.

**Table S1.** Selected bond lengths (Å) and bond angles (°) for **1-4**.

| Compound 1          |          |                     |          |
|---------------------|----------|---------------------|----------|
| Co(1)-O(5)#1        | 2.083(5) | O(5)#2-Co(1)-O(1)#3 | 91.5(2)  |
| Co(1)-O(5)#2        | 2.083(5) | O(5)#1-Co(1)-O(1)   | 91.5(2)  |
| Co(1)-O(1)#3        | 2.086(6) | O(5)#2-Co(1)-O(1)   | 88.5(2)  |
| Co(1)-O(1)          | 2.086(6) | O(1)#3-Co(1)-O(1)   | 180.00   |
| Co(1)-O(8)#4        | 2.142(5) | O(5)#1-Co(1)-O(8)#4 | 91.4(2)  |
| Co(1)-O(8)#5        | 2.142(5) | O(5)#2-Co(1)-O(8)#4 | 88.6(2)  |
| Co(2)-O(4)#1        | 2.011(6) | O(1)#3-Co(1)-O(8)#4 | 86.5(2)  |
| Co(2)-O(2)          | 2.019(5) | O(1)-Co(1)-O(8)#4   | 93.4(2)  |
| Co(2)-O(10)         | 2.055(8) | O(5)#1-Co(1)-O(8)#5 | 88.6(2)  |
| Co(2)-O(11)         | 2.097(7) | O(5)#2-Co(1)-O(8)#5 | 91.4(2)  |
| Co(2)-O(8)#4        | 2.111(6) | O(1)#3-Co(1)-O(8)#5 | 93.5(2)  |
| Co(2)-O(7)#4        | 2.179(6) | O(1)-Co(1)-O(8)#5   | 86.6(2)  |
| O(5)#1-Co(1)-O(5)#2 | 180.00   | O(8)#4-Co(1)-O(8)#5 | 180.000  |
| O(5)#1-Co(1)-O(1)#3 | 88.5(2)  | O(4)#1-Co(2)-O(2)   | 91.6(2)  |
| O(10)-Co(2)-O(11)   | 87.1(3)  | O(4)#1-Co(2)-O(10)  | 93.2(3)  |
| O(4)#1-Co(2)-O(8)#4 | 103.2(3) | O(2)-Co(2)-O(10)    | 87.6(3)  |
| O(2)-Co(2)-O(8)#4   | 97.7(2)  | O(4)#1-Co(2)-O(11)  | 89.9(3)  |
| O(10)-Co(2)-O(8)#4  | 162.6(3) | O(2)-Co(2)-O(11)    | 174.5(4) |

Symmetry transformations used to generate equivalent atoms: #1  $x+1, -y+1/2, z+1/2$ ; #2  $-x-1, y-1/2, -z+1/2$ ; #3  $-x, -y, -z+1$ ; #4  $x+1, -y-1/2, z+1/2$ ; #5  $-x-1, y+1/2, -z+1/2$ ; #6  $x-1, -y-1/2, z-1/2$ ; #7  $x-1, -y+1/2, z-1/2$ .

| Compound 2          |            |                     |            |
|---------------------|------------|---------------------|------------|
| Cd(1)-O(2)#1        | 2.239(3)   | O(4)#2-Cd(1)-O(4)#3 | 180.00     |
| Cd(1)-O(2)          | 2.239(3)   | O(2)#1-Cd(1)-O(5)#4 | 89.34(15)  |
| Cd(1)-O(4)#2        | 2.240(3)   | O(2)-Cd(1)-O(5)#4   | 90.66(15)  |
| Cd(1)-O(4)#3        | 2.240(3)   | O(4)#2-Cd(1)-O(5)#4 | 95.22(15)  |
| Cd(1)-O(5)#4        | 2.286(3)   | O(4)#3-Cd(1)-O(5)#4 | 84.78(15)  |
| Cd(1)-O(5)#5        | 2.286(3)   | O(2)#1-Cd(1)-O(5)#5 | 90.66(16)  |
| Cd(2)-O(1)          | 2.179(4)   | O(2)-Cd(1)-O(5)#5   | 89.34(15)  |
| Cd(2)-O(3)#3        | 2.235(4)   | O(4)#2-Cd(1)-O(5)#5 | 84.78(15)  |
| Cd(2)-O(5)#5        | 2.329(4)   | O(4)#3-Cd(1)-O(5)#5 | 95.22(15)  |
| Cd(2)-O(2W)         | 2.345(5)   | O(5)#4-Cd(1)-O(5)#5 | 180.00     |
| Cd(2)-O(1W)         | 2.344(7)   | O(1)-Cd(2)-O(3)#3   | 99.19(18)  |
| Cd(2)-O(6)#5        | 2.425(5)   | O(1)-Cd(2)-O(5)#5   | 105.66(15) |
| O(2)#1-Cd(1)-O(2)   | 180.00     | O(3)#3-Cd(2)-O(5)#5 | 98.46(15)  |
| O(2)#1-Cd(1)-O(4)#2 | 90.85(18)  | O(1)-Cd(2)-O(2W)    | 90.37(19)  |
| O(3)#3-Cd(2)-O(1W)  | 83.0(2)    | O(3)#3-Cd(2)-O(6)#5 | 92.22(19)  |
| O(5)#5-Cd(2)-O(1W)  | 146.47(17) | O(5)#5-Cd(2)-O(6)#5 | 54.99(14)  |
| O(2W)-Cd(2)-O(1W)   | 85.0(3)    | O(2W)-Cd(2)-O(6)#5  | 81.80(18)  |
| O(1)-Cd(2)-O(6)#5   | 70.11(19)  | O(1W)-Cd(2)-O(6)#5  | 91.53(19)  |

Symmetry transformations used to generate equivalent atoms: #1  $-x+2, -y+1, -z+1$ ; #2  $-x+2, -y+1, -z$ ; #3  $x, y, z+1$ ; #4  $-x+1, -y+1, -z$ ; #5  $x+1, y, z+1$ ; #6  $x-1, y, z-1$ ; #7  $x, y, z-1$ .

## Compound 3

|                     |           |                     |            |
|---------------------|-----------|---------------------|------------|
| Mn(1)-O(6)#1        | 2.123(2)  | O(4)#4-Mn(1)-O(2)   | 87.91(10)  |
| Mn(1)-O(6)#2        | 2.123(2)  | O(6)#1-Mn(1)-O(2)#5 | 91.10(10)  |
| Mn(1)-O(4)#3        | 2.152(2)  | O(6)#2-Mn(1)-O(2)#5 | 88.90(10)  |
| Mn(1)-O(4)#4        | 2.152(2)  | O(4)#3-Mn(1)-O(2)#5 | 87.91(10)  |
| Mn(1)-O(2)          | 2.244(2)  | O(4)#4-Mn(1)-O(2)#5 | 92.09(10)  |
| Mn(1)-O(2)#5        | 2.244(2)  | O(2)-Mn(1)-O(2)#5   | 180.00     |
| Mn(2)-O(3)#3        | 2.095(3)  | O(3)#3-Mn(2)-O(5)#2 | 90.17(11)  |
| Mn(2)-O(5)#2        | 2.127(3)  | O(3)#3-Mn(2)-O(1W)  | 102.13(11) |
| Mn(2)-O(1W)         | 2.137(3)  | O(5)#2-Mn(2)-O(1W)  | 87.18(11)  |
| Mn(2)-O(10)         | 2.155(3)  | O(5)#2-Mn(2)-O(10)  | 179.19(12) |
| Mn(2)-O(2)          | 2.279(2)  | O(3)#3-Mn(2)-O(10)  | 89.02(13)  |
| Mn(2)-O(1)          | 2.314(2)  | O(1W)-Mn(2)-O(10)   | 92.97(14)  |
| O(6)#1-Mn(1)-O(6)#2 | 180.00    | O(3)#3-Mn(2)-O(2)   | 104.07(10) |
| O(6)#1-Mn(1)-O(4)#3 | 89.03(10) | O(5)#2-Mn(2)-O(2)   | 94.07(10)  |
| O(6)#2-Mn(1)-O(4)#3 | 90.97(10) | O(1W)-Mn(2)-O(2)    | 153.76(10) |
| O(6)#1-Mn(1)-O(4)#4 | 90.97(10) | O(10)-Mn(2)-O(2)    | 86.14(12)  |
| O(6)#2-Mn(1)-O(4)#4 | 89.03(10) | O(3)#3-Mn(2)-O(1)   | 160.02(10) |
| O(4)#3-Mn(1)-O(4)#4 | 180.00    | O(5)#2-Mn(2)-O(1)   | 97.01(10)  |
| O(6)#1-Mn(1)-O(2)   | 88.90(10) | O(1W)-Mn(2)-O(1)    | 96.84(10)  |
| O(6)#2-Mn(1)-O(2)   | 91.10(10) | O(10)-Mn(2)-O(1)    | 83.76(12)  |
| O(4)#3-Mn(1)-O(2)   | 92.09(10) | O(2)-Mn(2)-O(1)     | 56.96(8)   |

Symmetry transformations used to generate equivalent atoms: #1 -x+1,-y+2,-z; #2 x+1,y,z+1; #3 -x+1,-y+2,-z+1; #4 x+1,y,z; #5 -x+2,-y+2,-z+1; #6 x-1,y,z; #7 x-1,y,z-1.

## Compound 4

|                      |            |                     |            |
|----------------------|------------|---------------------|------------|
| Zn(1)-O(10)#1        | 2.059(3)   | O(1)#2-Zn(1)-O(10)  | 89.63(13)  |
| Zn(1)-O(1)#2         | 2.078(3)   | O(4)-Zn(1)-O(10)    | 92.37(13)  |
| Zn(1)-O(4)           | 2.100(3)   | O(11)-Zn(1)-O(10)   | 99.07(14)  |
| Zn(1)-O(11)          | 2.107(4)   | O(1W)-Zn(1)-O(10)   | 175.70(14) |
| Zn(1)-O(1W)          | 2.112(4)   | O(10)-Zn(2)-O(5)    | 118.64(13) |
| Zn(1)-O(10)          | 2.119(3)   | O(8)#3-Zn(2)-O(5)   | 100.40(15) |
| Zn(2)-O(10)          | 1.936(3)   | O(10)-Zn(2)-O(2)#2  | 101.75(14) |
| Zn(2)-O(8)#3         | 1.940(3)   | O(8)#3-Zn(2)-O(2)#2 | 108.66(15) |
| Zn(2)-O(5)           | 1.978(3)   | O(5)-Zn(2)-O(2)#2   | 103.66(15) |
| Zn(2)-O(2)#2         | 1.992(3)   | O(1)#2-Zn(1)-O(11)  | 90.37(14)  |
| O(10)#1-Zn(1)-O(1)#2 | 170.98(13) | O(4)-Zn(1)-O(11)    | 166.61(15) |
| O(10)#1-Zn(1)-O(4)   | 88.63(14)  | O(10)#1-Zn(1)-O(1W) | 98.83(14)  |
| O(1)#2-Zn(1)-O(4)    | 96.68(15)  | O(1)#2-Zn(1)-O(1W)  | 89.02(14)  |
| O(10)#1-Zn(1)-O(11)  | 85.93(13)  | O(4)-Zn(1)-O(1W)    | 83.73(15)  |
| O(10)#1-Zn(1)-O(10)  | 82.85(13)  | O(11)-Zn(1)-O(1W)   | 85.02(15)  |

Symmetry transformations used to generate equivalent atoms: #1 -x,-y+1,-z+2; #2 x,y,z-1; #3 -x+1,y-1/2,-z+5/2; #4 x,y,z+1; #5 -x+1,y+1/2,-z+5/2.

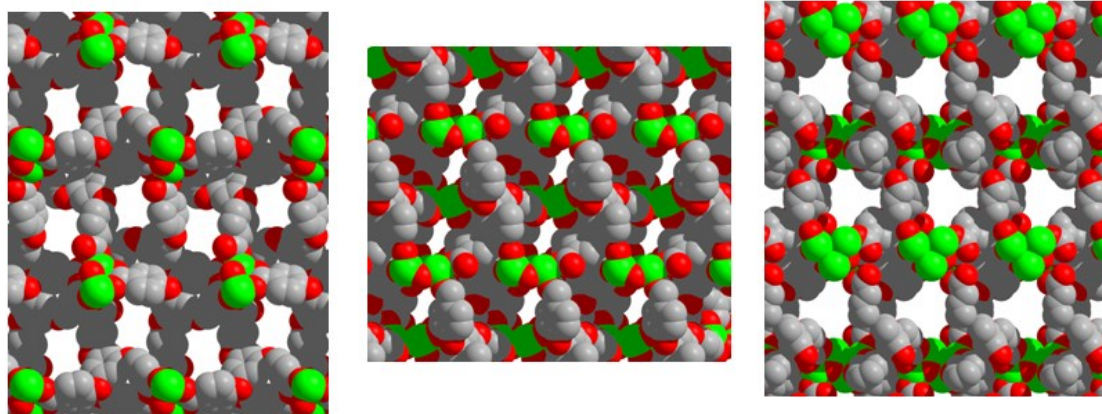

(a)

(b)

(c)

Figure S1. A space-filling view of the porous network showing three different types of 1D channels along the crystallographic (a) *a*-axis, (b) *b*-axis, and (c) *c*-axis, in which the solvent molecules are omitted for clarity.

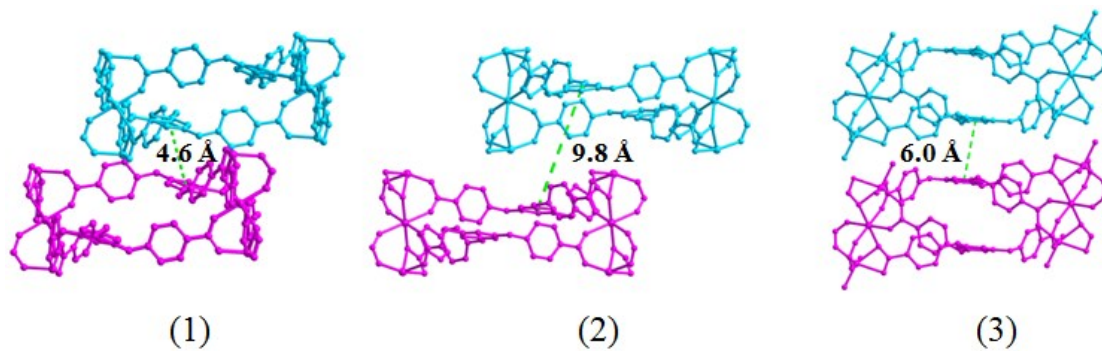

(1)

(2)

(3)

Figure S2. The distances observed between the adjacent layers in **1-3**.

Table S2 The twisting angles of 4-carboxyphenoxy groups vs. the central benzene ring.

| Complex  | Twisting angles |       |       |
|----------|-----------------|-------|-------|
| <b>1</b> | 112.7           | 113.1 | 132.7 |
| <b>2</b> | 111.1           | 112.6 | 129.3 |
| <b>3</b> | 61.6            | 106.9 | 168.3 |
| <b>4</b> | 115.5           | 118.8 | 122.3 |

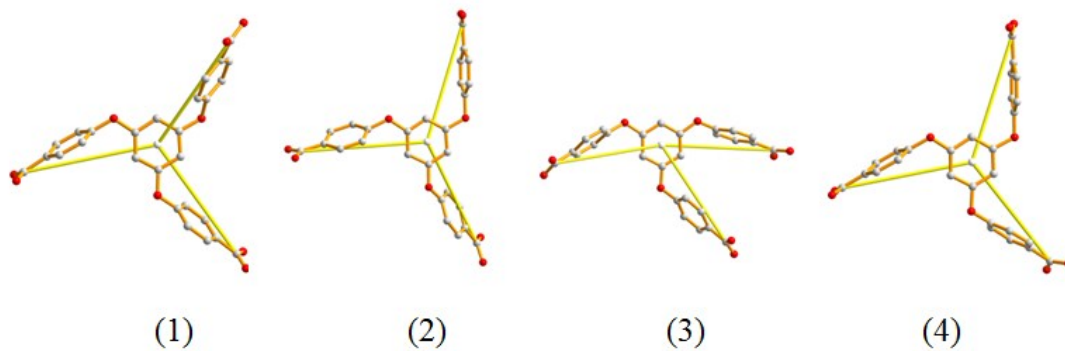

(a) for compound 1

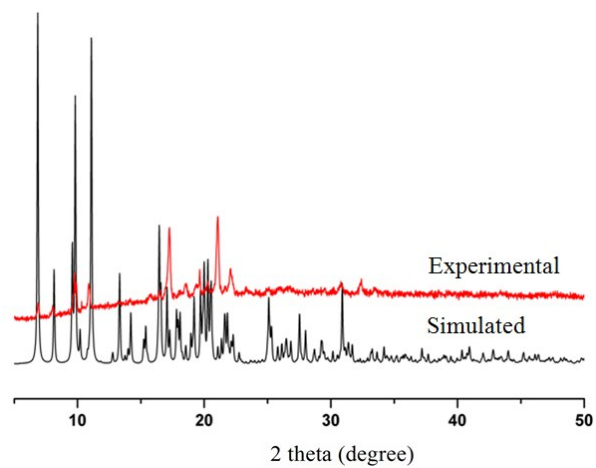

(a) for compound 2

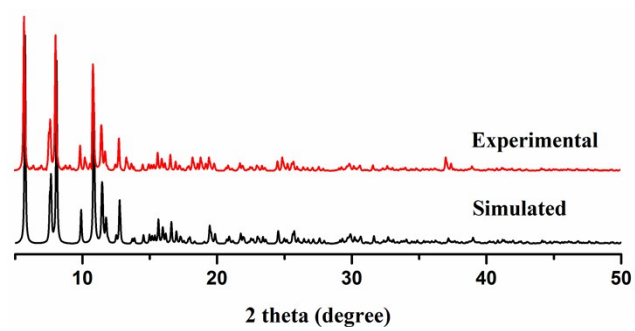

(c) for compound **3**

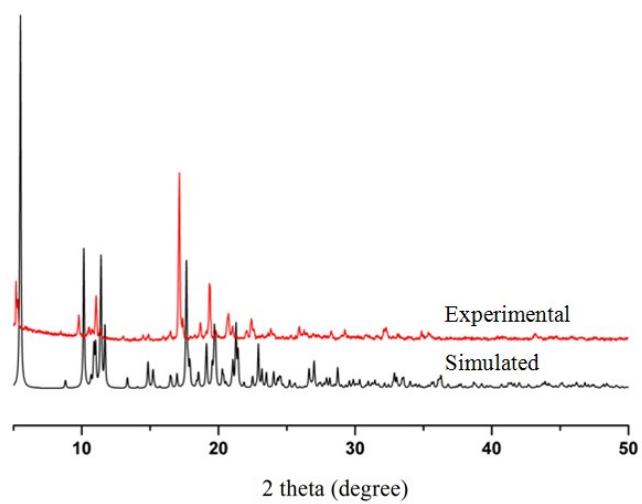

(d) for compound **4**

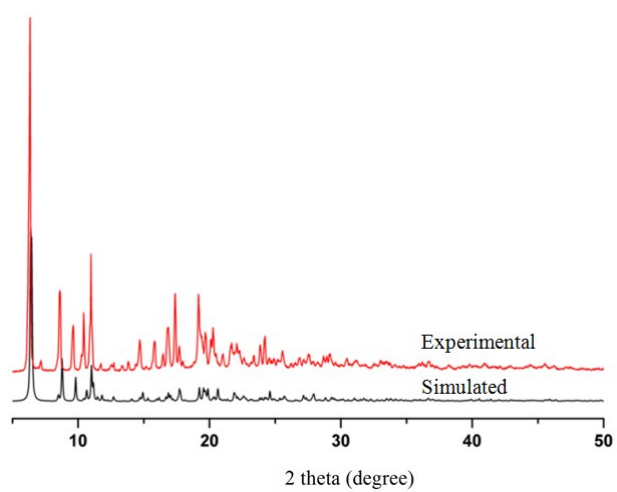

Figure S3. Powder x-ray diffraction patterns of **1** to **4**.

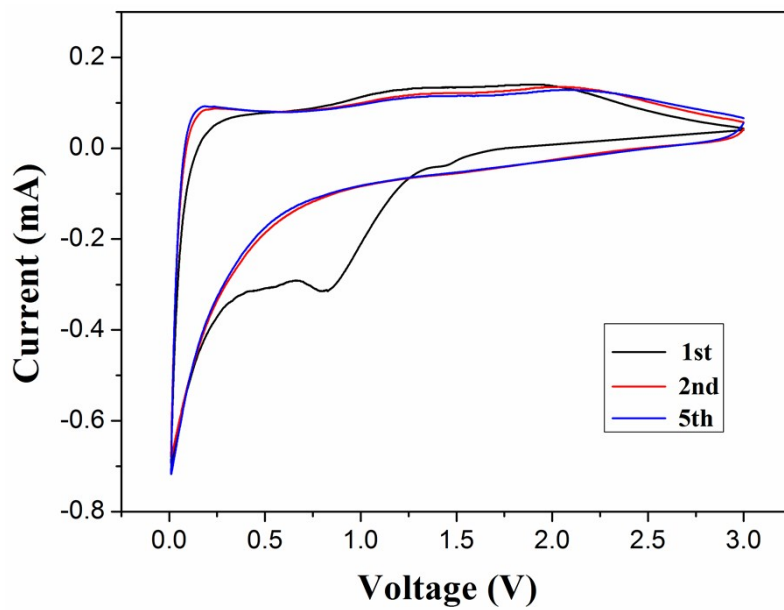

Figure S4. Cyclic voltammetry curve at  $0.1\text{mV s}^{-1}$  scan rate.
